# Carbon Dioxide Flux from Rice Paddy Soils in Central China: Effects of Intermittent Flooding and Draining Cycles

Yi Liu<sup>1</sup>, Kai-yuan Wan<sup>1</sup>, Yong Tao<sup>1</sup>, Zhi-guo Li<sup>1</sup>, Guo-shi Zhang<sup>1</sup>, Shuang-lai Li<sup>2</sup>, Fang Chen<sup>1\*</sup>

**1** Laboratory of Aquatic Botany and Watershed Ecology, Wuhan Botanical Garden, Chinese Academy of Sciences China, Wuhan, China, **2** Institute of Plant Protection and Soil Fertilizer, Hubei Academy of Agricultural Sciences, Wuhan, China

## Abstract

A field experiment was conducted to (i) examine the diurnal and seasonal soil carbon dioxide (CO<sub>2</sub>) fluxes pattern in rice paddy fields in central China and (ii) assess the role of floodwater in controlling the emissions of CO<sub>2</sub> from soil and floodwater in intermittently draining rice paddy soil. The soil CO<sub>2</sub> flux rates ranged from  $-0.45$  to  $8.62 \mu\text{mol}\cdot\text{m}^{-2}\cdot\text{s}^{-1}$  during the rice-growing season. The net effluxes of CO<sub>2</sub> from the paddy soil were lower when the paddy was flooded than when it was drained. The CO<sub>2</sub> emissions for the drained conditions showed distinct diurnal variation with a maximum efflux observed in the afternoon. When the paddy was flooded, daytime soil CO<sub>2</sub> fluxes reversed with a peak negative efflux just after midday. In draining/flooding alternating periods, a sudden pulse-like event of rapidly increasing CO<sub>2</sub> efflux occurred in response to re-flooding after draining. Correlation analysis showed a negative relation between soil CO<sub>2</sub> flux and temperature under flooded conditions, but a positive relation was found under drained conditions. The results showed that draining and flooding cycles play a vital role in controlling CO<sub>2</sub> emissions from paddy soils.

**Citation:** Liu Y, Wan K-y, Tao Y, Li Z-g, Zhang G-s, et al. (2013) Carbon Dioxide Flux from Rice Paddy Soils in Central China: Effects of Intermittent Flooding and Draining Cycles. PLoS ONE 8(2): e56562. doi:10.1371/journal.pone.0056562

**Editor:** Dorian Q. Fuller, University College London, United Kingdom

**Received:** August 7, 2012; **Accepted:** January 11, 2013; **Published:** February 20, 2013

**Copyright:** © 2013 Liu et al. This is an open-access article distributed under the terms of the Creative Commons Attribution License, which permits unrestricted use, distribution, and reproduction in any medium, provided the original author and source are credited.

**Funding:** The study was supported by the National Natural Science Foundation of China (31100386), and the Cooperated Program with International Plant Nutrition Institute (IPNI-HB-33). The funders had no role in study design, data collection and analysis, decision to publish, or preparation of the manuscript.

**Competing Interests:** The authors have declared that no competing interests exist.

\* E-mail: fchenipni@126.com

## Introduction

Increases in the emission of greenhouse gases such as carbon dioxide (CO<sub>2</sub>), methane (CH<sub>4</sub>), and nitrous oxide (N<sub>2</sub>O) from soil surface to the atmosphere have been a worldwide concern for several decades [1–3]. CO<sub>2</sub> is recognized as a significant contributor to global warming and climatic change, accounting for 60% of global warming or total greenhouse effect [4]. Measuring the soil CO<sub>2</sub> efflux is crucial for accurately evaluating the effects of soil management practices on global warming and carbon cycling. Temporal variations in soil CO<sub>2</sub> flux have been observed in almost all ecosystems [5,6]. Soil CO<sub>2</sub> fluxes are usually higher during warm seasons and lower during cold seasons [7,8]. The seasonal variation is driven largely by changes in temperature, moisture, and photosynthate production [5,9,10]. The main factors controlling seasonal variations in soil CO<sub>2</sub> flux may depend on the type of ecosystems and the climate.

The increase in population in areas where rice is the main cultivated crop has led to the increase in worldwide area under rice cultivation by approximately 40% over the last 50 years [11]. In particular, Asian countries (China, India, Indonesia, etc.) have accounted for approximately 90% of the total global area under rice cultivation for the last 50 years [11]. Rice paddies in monsoonal Asia play an important role in the global budget of greenhouse gases such as CH<sub>4</sub> and CO<sub>2</sub> [12,13]. Carbon emissions (esp. CH<sub>4</sub>) from rice paddies are expected to be a long-term contributor to greenhouse gases, perhaps

increasingly over the past 5000 years [14]. Efforts have been made recently to model carbon emissions based on the history and archaeology of rice cultivation in Asia. However, since these emissions from rice cultivation vary a great deal, this poses a major challenge in modeling this phenomenon [15]. As a result, experimental research from rice paddies assumes greater importance. Many of the factors controlling gas exchange between rice paddies and the atmosphere are different from those in dryland agriculture and other ecosystems because rice is flooded during most of its cultivation period. The dynamics of soil CO<sub>2</sub> fluxes in a paddy field differs significantly from that in fields with upland crop cultivation in which aerobic decomposition process is dominant [6,16,17]. Field studies designed to measure soil CO<sub>2</sub> fluxes and improve our understanding of the factors controlling the fluxes are thus needed.

Intermittent draining and flooding, which is one of the most important water management practices in rice production, was found to be the most promising option for CH<sub>4</sub> mitigation also [18,19]. Mid-season aeration was also found to be one of the basic techniques for raising rice yields in China [20] and was widely adopted in rice cultivation where irrigation/drainage system was well managed. The management induced change of anaerobic and aerobic conditions results in temporal and spatial (vertical, horizontal) variations in reduction and oxidation (redox) reactions affecting the dynamics of organic and mineral soil constituents [21,22]. Thus, intermittent drainage with increased impacts can strongly affect soil CO<sub>2</sub> emissions [6,16]. However, the mecha-

nism of CO<sub>2</sub> exchange between rice paddies and the atmosphere is not fully understood. For example, using eddy covariance measurements, Miyata et al. [16] found a significantly larger net CO<sub>2</sub> flux from the rice paddy soil to atmosphere when the field was drained compared to when it was flooded. These differences in the CO<sub>2</sub> flux were mainly due to increased CO<sub>2</sub> emissions from the soil surface under drained conditions resulting from the removal of diffusion barrier caused by the floodwater. The existence of floodwater, anaerobic soil, or changes in the micrometeorological environment with flooding influences root activity, photosynthesis, and respiration of rice plants [23]. Activity of aquatic plants such as algae in the floodwater may also affect CO<sub>2</sub> exchange between rice paddies and the atmosphere [22]. Most of the data obtained so far were not sufficiently detailed to examine the influence of these factors on the CO<sub>2</sub> exchange in rice paddies.

The scale and dynamics of growing-season CO<sub>2</sub> emissions from paddy fields have been documented mostly through flux measurements made with low time resolution using manual chambers [6,16,17]. In this study, we report a data set that extends hourly CO<sub>2</sub> flux measurements during the rice-growing season in 2011 to improve the understanding of the process controlling CO<sub>2</sub> exchanges in rice paddy soils. The measurements were used to assess the role of floodwater in controlling the exchanges of CO<sub>2</sub> from the paddy soil. The objectives of this study were to: (i) analyze seasonal and diurnal variation of soil CO<sub>2</sub> fluxes in rice paddy fields in the Yangtze River valley; and (ii) determine the effects of related environmental factors associated with flooding and draining cycles in paddy soils on CO<sub>2</sub> flux from the soil surface.

## Materials and Methods

### Site Description

Field experiments were conducted over one rice growing season, i.e. from June to October 2011, at Nanhu Agricultural Research Station (30°28'N, 114°25'E, altitude 20 m). The research site is owned by Hubei Academy of Agricultural Sciences. The field studies did not involve endangered or protected species and no specific permits were required for the described field studies. The site lies in a typical area of the humid mid-subtropical monsoon climate in the Yangtze River valley of China. The mean annual temperature of the site is 17°C, the cumulative temperature above 10°C is 5,190°C, and the average annual frost-free period is 276 d. The average annual precipitation is 1,300 mm, with most of the rainfall occurring between April and August. The paddy field soil is a Hydromorphic paddy soil, which is a silty clay loam derived from Quaternary yellow sediment. Some physical and chemical properties of the experimental soil (0–20 cm depth) were: pH, 6.3; organic matter, 30.23 g.kg<sup>-1</sup>; total N, 2.05 g.kg<sup>-1</sup>; available P, 5 mg.kg<sup>-1</sup>; available K, 101 mg.kg<sup>-1</sup>; soil bulk density, 1.26 g.cm<sup>-3</sup>. The experimental site has been under rice-wheat cultivation since last 30 years, where rice is planted from June to October each year and wheat is planted from November to May the following year. Daily meteorological information (including rainfall and temperature) during the 2011 rice-growing season is presented in Fig. 1.

### Field Management

In 2011, rice was transplanted to the paddy field on 15 June with a plant to plant spacing of 20 cm and a row spacing of 27 cm. Irrigation started on 13 June and the field was flooded continuously until 17 July. This was followed by five intermittent flooding and draining cycles, with 3–7 days of flooding and 2–8

days of draining. The field was not irrigated and drained about a month before harvesting. The number of flooded days were 55, while the number of drained days were 53 during the 2011 rice-growing seasons. The depth of standing water during flooding periods was, on average, 10 cm. Before transplanting, base fertilizer – consisting of 36 kg N ha<sup>-1</sup> in the form of urea (N 46%), 45 kg P<sub>2</sub>O<sub>5</sub> ha<sup>-1</sup> in the form of calcium superphosphate (P<sub>2</sub>O<sub>5</sub> 12%), and 90 kg K<sub>2</sub>O ha<sup>-1</sup> in the form of potassium sulfate (K<sub>2</sub>O 45%) – was broadcast over the soil, which was then turned over by plowing to transfer the fertilizer to the subsurface (i.e., beyond 20 cm soil depth). Additional nitrogen, in the form of urea, was applied at tillering and heading stages of rice growth at rates of 36 and 18 kg N ha<sup>-1</sup>, respectively. Rice grain was harvested from 1 to 3 October, 2011.

### Measurement of Soil CO<sub>2</sub> Flux

The soil CO<sub>2</sub> flux was measured using the soil respiration method, where a cylinder static chamber of 22.5 cm diameter and 30 cm height was placed on the soil. The rate of increase in CO<sub>2</sub> concentration within the chamber was monitored with an ACE (ADC BioScientific Ltd) automated soil CO<sub>2</sub> flux system. The automated design means that during analysis cycles, the soil can be exposed to ambient conditions before the chamber closes to take measurements. This means the ACE will continue to collect data without any human intervention for as long as permitted by its battery life. This makes the ACE an ideal research instrument for continuous assessment of below-ground respiration and carbon stores in on-going experiments. Static chambers were inserted to a depth of approximately 7 cm, extending 23 cm above the soil surface to allow placing of the chamber. During the flooding period, the water remained in situ. The time span between chamber contact with the soil and the start of measurements (the deadband) was 20 s; this has previously been determined to be sufficient for pressure equilibration. The measurement time was set to 180 s. The ACE has a highly accurate CO<sub>2</sub> infrared gas analyzer housed directly inside the soil chamber, with no long gas tubing connecting the soil chamber and no separate analyzer. This ensures accurate and robust measurements, and the fastest possible response times to fluxes in gas exchange. During the soil CO<sub>2</sub> flux measurements, air temperature within the canopy and soil temperature at 2 cm depth were also recorded by the ACE analyzer unit. And the measurements were made at 1-hour intervals during the rice-growing season. During a 24-hour period, the values were averaged to give the mean daily soil CO<sub>2</sub> flux. Survey sites of three replications were taken from the experiment plot. Survey sites were located in the space between two rows, and the two sites were located 5–7 m apart. Three ACE stations were connected via an ACE Master control unit. Each CO<sub>2</sub> flux measurement from the experiment plot was thus an average of three individual measurements.

In order to examine the diurnal soil CO<sub>2</sub> flux pattern in a paddy field, soil CO<sub>2</sub> flux as well as canopy air temperature, soil temperature and PAR were also measured simultaneously at 1 hour intervals for 24 hours under both flooded (6/28~6/29 and 8/14~8/15) and drained (7/20~7/21 and 9/4~9/5) conditions. During these 24 hour periods, the sky was clear and with no clouds.

To study the soil CO<sub>2</sub> emissions in relation to draining and flooding cycle system, two draining/flooding alternation and circulation periods (7/23~7/28 and 8/29~9/4) were tested. We continuously monitored soil CO<sub>2</sub> fluxes along with air temperature within the canopy and soil temperature before, during, and after each flooding and draining cycle in the experiment paddy soil. Clear days continued during the experiment, but temperature

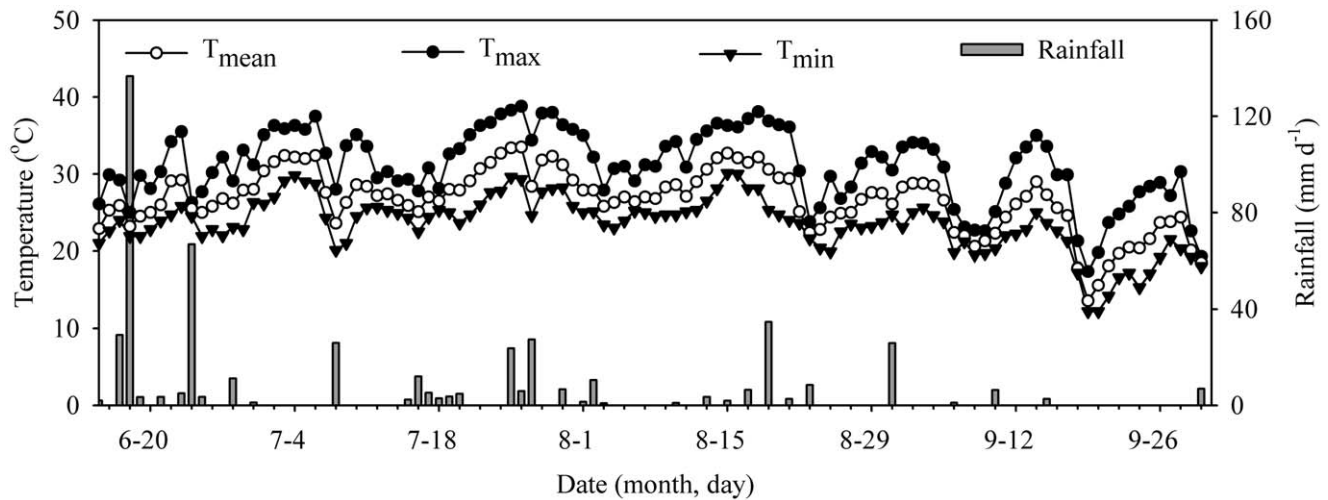

**Figure 1. Air temperature records and rainfall events at the study site during the experimental period.** ( $T_{\text{mean}}$ : mean temperature;  $T_{\text{max}}$ : maximum temperature;  $T_{\text{min}}$ : minimum temperature). doi:10.1371/journal.pone.0056562.g001

conditions were a little different from day to day. Flooding started at 9 am (09:00 h) and water depth reached 10 cm around midday. The water level was gradually decreased with cessation of irrigation.

## Results

### Seasonal Variations in Soil CO<sub>2</sub> Fluxes from Paddy Fields

The daily course of soil CO<sub>2</sub> flux rate is shown in Fig. 2A, while Fig. 2B shows the air temperature within the canopy and soil temperature (2 cm). The soil CO<sub>2</sub> flux rates ranged from  $-0.45$  to  $8.62 \mu\text{mol}\cdot\text{m}^{-2}\cdot\text{s}^{-1}$ , exhibiting a wide seasonal fluctuation during the rice-growing season. The soil CO<sub>2</sub> fluxes were generally low at the rice seedling stage, when it remained at about  $0\sim 1 \mu\text{mol}\cdot\text{m}^{-2}\cdot\text{s}^{-1}$  until the first mid-summer drainage. Then the fluxes increased gradually until the tillering stage, with a midway peak near the end of the first mid-summer drainage. From the tillering stage to the physiological maturity stage (i.e. from July to September), the daily average soil CO<sub>2</sub> flux rates had a magnitude ranging between 0 and  $9 \mu\text{mol}\cdot\text{m}^{-2}\cdot\text{s}^{-1}$ , which then settled at around  $1\sim 3 \mu\text{mol}\cdot\text{m}^{-2}\cdot\text{s}^{-1}$  until the end of the season. The differences in the rates of soil CO<sub>2</sub> fluxes between drained and flooded conditions are also shown in Fig. 2a. Mean soil CO<sub>2</sub> fluxes under flooded conditions was  $0.72$  (with standard deviation of  $0.48$ )  $\mu\text{mol}\cdot\text{m}^{-2}\cdot\text{s}^{-1}$  ( $n = 55$ ), whereas under drained conditions, the corresponding value was  $2.79$  (with standard deviation of  $1.73$ )  $\mu\text{mol}\cdot\text{m}^{-2}\cdot\text{s}^{-1}$  ( $n = 53$ ). It is likely that floodwater decreased topsoil diffusivity, and may thus have decreased soil CO<sub>2</sub> effluxes [24]. Reduction of biological activity under anoxic condition may be another reason for low soil CO<sub>2</sub> fluxes during the flooding period [22].

The air temperature within the canopy and soil temperature (2 cm) exhibited seasonal patterns similar to soil CO<sub>2</sub> fluxes. The temperature varied from  $15$  to  $33^\circ\text{C}$  during the whole growing period of rice in 2011. From June to September, the temperature ranged from  $21$  to  $33^\circ\text{C}$ , and several peaks occurred. From the mid of September (9/18) to the day before harvesting (about 15 days), the average temperature of  $19.7^\circ\text{C}$  for air temperature within the canopy and  $19.8^\circ\text{C}$  for soil temperature (0–2 cm) are shown in Fig. 2.

### Diurnal Patterns of Soil CO<sub>2</sub> Fluxes in Paddy Fields

The diurnal variations in soil CO<sub>2</sub> fluxes and incident PAR, air temperature within the canopy, and soil temperature under both flooding (6/28~6/29 and 8/14~8/15) and draining (7/20~7/21 and 9/4~9/5) conditions are shown in Fig. 3. These experiments began in the early evening, running for just under 24 h. Under flooding conditions, fluxes of CO<sub>2</sub> were, as expected, lower because the diffusivity and biological activity of the topsoil was substantially reduced by floodwater. Initially, there was a slow release of CO<sub>2</sub> into the atmosphere as a positive efflux settled at around  $0\sim 1 \mu\text{mol}\cdot\text{m}^{-2}\cdot\text{s}^{-1}$  throughout the night. At sunrise the fluxes decreased, even negatively peaked at around 16:00 (negative values indicate carbon sequestration). This may have been because some aquatic plants, such as algae, inside the floodwater began to photosynthesize again. In contrast, CO<sub>2</sub> flux under draining conditions was positive and settled around  $2\sim 4 \mu\text{mol}\cdot\text{m}^{-2}\cdot\text{s}^{-1}$  throughout the night, despite falling temperatures (Fig. 3). After sunrise, CO<sub>2</sub> fluxes remained positive and increased with temperature, reaching a peak at 2 pm (14:00 h) before falling again as temperatures declined.

### Soil CO<sub>2</sub> Fluxes Related to Conversion Processes of Draining and Flooding Cycles

Fig. 4 shows soil CO<sub>2</sub> fluxes, canopy air temperature, and soil temperature before, during, and after the flooding and draining cycle. Soil CO<sub>2</sub> fluxes increased immediately after flooding, and exceeded pre-flooding values by two-thirds. This increase was abrupt and pulslike. Replacement of soil air by water should thus cause an enriched CO<sub>2</sub> pulse. And then, the soil CO<sub>2</sub> flux rate subsequently decreased by 70~90% within only one hour after the water pulse. Within the following days, the CO<sub>2</sub> fluxes remained at minimum levels (about  $-2\sim 2 \mu\text{mol}\cdot\text{m}^{-2}\cdot\text{s}^{-1}$ ) during flooding. As standing water declined and eventually disappeared, the CO<sub>2</sub> fluxes gradually increased and finally reached to maximum levels (about  $6\sim 8 \mu\text{mol}\cdot\text{m}^{-2}\cdot\text{s}^{-1}$ ). This indicates that draining and flooding cycles play vital roles in controlling CO<sub>2</sub> emissions in a paddy soil.

### Variability of Soil CO<sub>2</sub> Fluxes Related to Temperature

Temperature has a marked effect on CO<sub>2</sub> emissions from the soil surface. To study the relationship between soil CO<sub>2</sub> flux rates

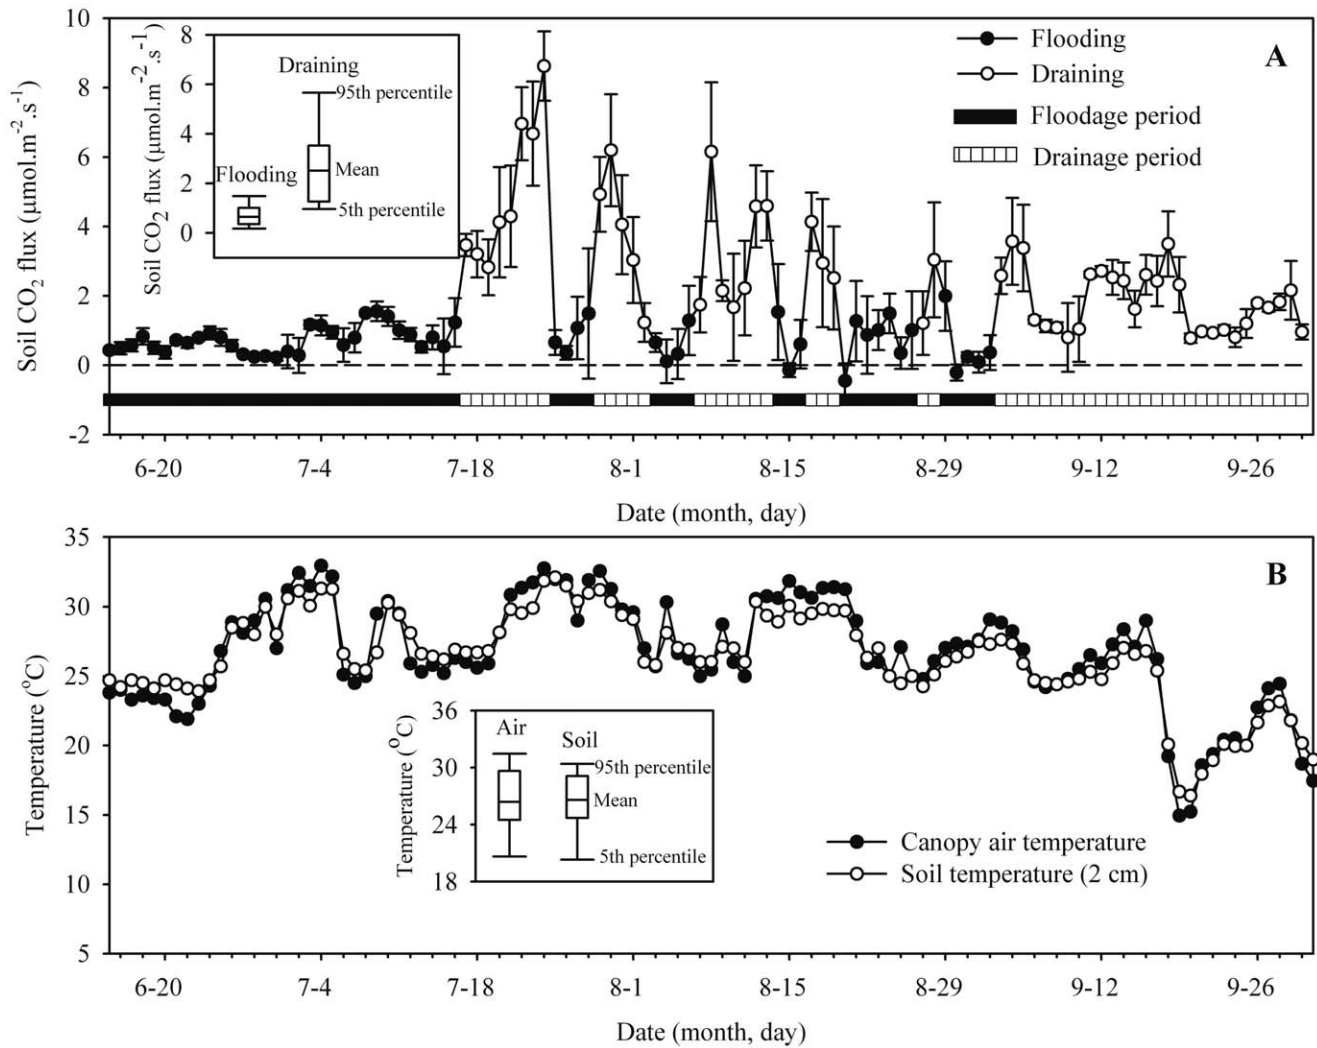

**Figure 2. Seasonal variations of soil CO<sub>2</sub> flux, soil temperature (2 cm) and crop canopy temperature in an intermittent draining and flooding rice paddy.** The insets indicate box-plot of soil CO<sub>2</sub> fluxes under flooded and drained conditions, and box-plot of canopy air and soil temperature during the 2011 rice-growing season.  
doi:10.1371/journal.pone.0056562.g002

and temperature, two environmental temperatures (air temperature within the canopy and soil temperature) were tested in this study (Fig. 5). Linear and exponential regression analysis were used to model the influence of temperature on soil CO<sub>2</sub> flux rates under both flooded and drained conditions. Negative linear correlations between temperature and soil CO<sub>2</sub> fluxes were found under flooded conditions ( $R^2 = 0.1524$ ,  $P < 0.001$  and  $R^2 = 0.0535$ ,  $P < 0.001$  for canopy air and soil temperatures, respectively), presumably because standing water limited soil CO<sub>2</sub> emissions. On the contrary, soil CO<sub>2</sub> flux rates increased as an exponential function of temperature under drained conditions ( $R^2 = 0.1963$ ,  $P < 0.001$  and  $R^2 = 0.2382$ ,  $P < 0.001$  for canopy air and soil temperatures, respectively).

## Discussion

Previous research had revealed that water management systems show the highest potential in controlling CH<sub>4</sub> emissions [25]. CH<sub>4</sub> emissions were higher under continuous flooding than intermittent draining practices [26,27], while they declined during the drainage period to near zero and increased after re-flooding [28]. Drainage

during the rice cultivation period significantly increased CO<sub>2</sub> emissions in our study, while CH<sub>4</sub> emissions were clearly reduced and has been shown by other research [18,29]. Miyata et al. [16] also found that flooded or drainage conditions of paddy soils had strong effects not only on CH<sub>4</sub> emissions but also on CO<sub>2</sub> emissions. Lower CH<sub>4</sub> emissions due to water drainage may increase CO<sub>2</sub> emission. However, during the submerged period of paddy rice cultivation, CO<sub>2</sub> production in the soil is severely restricted under flooding condition. This effect can be explained with two basic mechanisms [8], which could be observed in a paddy soil (Fig. 6). First, flooding a field for subsequent rice cultivation cuts off the oxygen supply from the atmosphere and the microbial activities switch from aerobic (i.e. oxic condition) to facultative (i.e. hypoxic condition) and to anaerobic (i.e. anoxic condition) conditions [22]. As a consequence, biological activity reduction under anoxic condition, rather than completely, inhibits CO<sub>2</sub> production. At the same time, water replaces the gaseous phase in the soil pores. Since CO<sub>2</sub> diffusion rates in water are four orders of magnitude lower than those in air, a part of the produced CO<sub>2</sub> is stored in the soil. Hence, the soil CO<sub>2</sub> fluxes can be dramatically reduced by flooding during the paddy rice cultivation

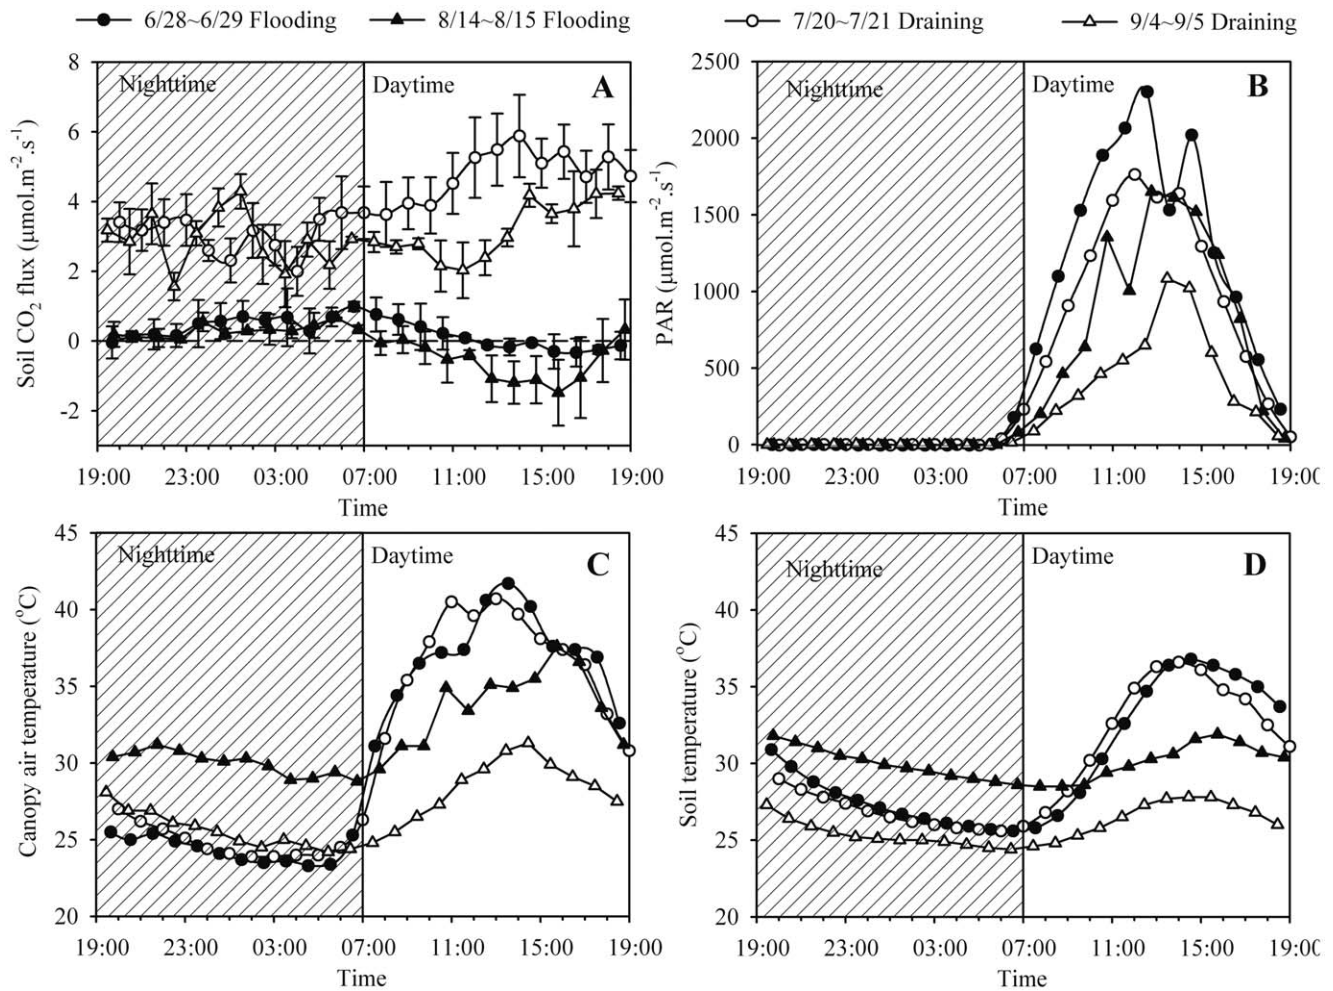

**Figure 3. Diurnal patterns of soil CO<sub>2</sub> flux related to PAR, canopy air temperature and soil temperature (2 cm) under both drained and flooded conditions in a rice paddy.**  
doi:10.1371/journal.pone.0056562.g003

[6,16,23]. Results from the present study provide indirect support for this conclusion, since the soil CO<sub>2</sub> flux rates under flooded conditions were significantly lower than those observed under drained conditions (Fig. 2).

Our study also demonstrated that, in rice fields exposed to intermittent flooding and draining cycles, environmental factors regulating diurnal fluctuations in CO<sub>2</sub> flux are quite different from those governing seasonal variations. Under drainage conditions, soil CO<sub>2</sub> flux showed a single peak at 2 pm (14:00 h), and was lowest in the wee hours. This is in agreement with patterns recorded in forests [5], grassland [30] and dryland areas [31]. Furthermore, correlation analysis revealed that canopy air temperature and soil temperature explained most of the diurnal fluctuations in soil CO<sub>2</sub> flux. In contrast, soil CO<sub>2</sub> flux during the flooding period fluctuated within  $\pm 2 \mu\text{mol.m}^{-2}.\text{s}^{-1}$  and soil CO<sub>2</sub> flux rates had small negative values in the daytime (i.e., the paddy soil was obviously a net CO<sub>2</sub> sink), although soil CO<sub>2</sub> fluxes were positive throughout the night. This occurred primarily because of the layer of standing water, which is the habitat of bacteria, phytoplankton, macrophytes and small fauna. The photosynthesis process of these aquatic organisms affects ecosystem respiration [22].

Sudden pulse-like events of rapidly increasing CO<sub>2</sub> efflux occur in soils under paddy fields in response to re-flooding after draining.

Similarly, an abrupt rise in near-surface soil moisture due to precipitation can cause an instantaneous soil respiration pulse [24,32]. Soil respiration is shown to respond rapidly and instantaneously to the onset of rain and return to the pre-rain rate shortly after the rain stops [32]. The likely reason for this is that CO<sub>2</sub> is heavier than air and accumulates by gravitation within the air spaces of the soil. Replacement of this gaseous carbon by dilution will not occur without water and, unstirred by turbulent mixing, accumulation of CO<sub>2</sub> within the soil will increase. A sudden flooding might simply seal the soil pores, replace the captured CO<sub>2</sub> by water, and release it back into the air [33]. These occurrences, termed “Birch effect”, can have a marked influence on the ecosystem carbon balance [34,35]. Indeed, this transient effect was observed in several studies at the ecosystem [36] and soil [37] scales. **On the other hand**, our analysis indicates that soil CO<sub>2</sub> flux was gradually increased during flooding to draining conversion processes. Response of soil CO<sub>2</sub> flux rates to these processes can be viewed in terms of increased diffusivity due to decrease in water filled pore space. Besides this general effect of soil aeration on soil CO<sub>2</sub> flux, the higher soil respiration rates during the drainage periods may have resulted from the higher physiological activity of microorganisms in not limiting soil oxic conditions [22].

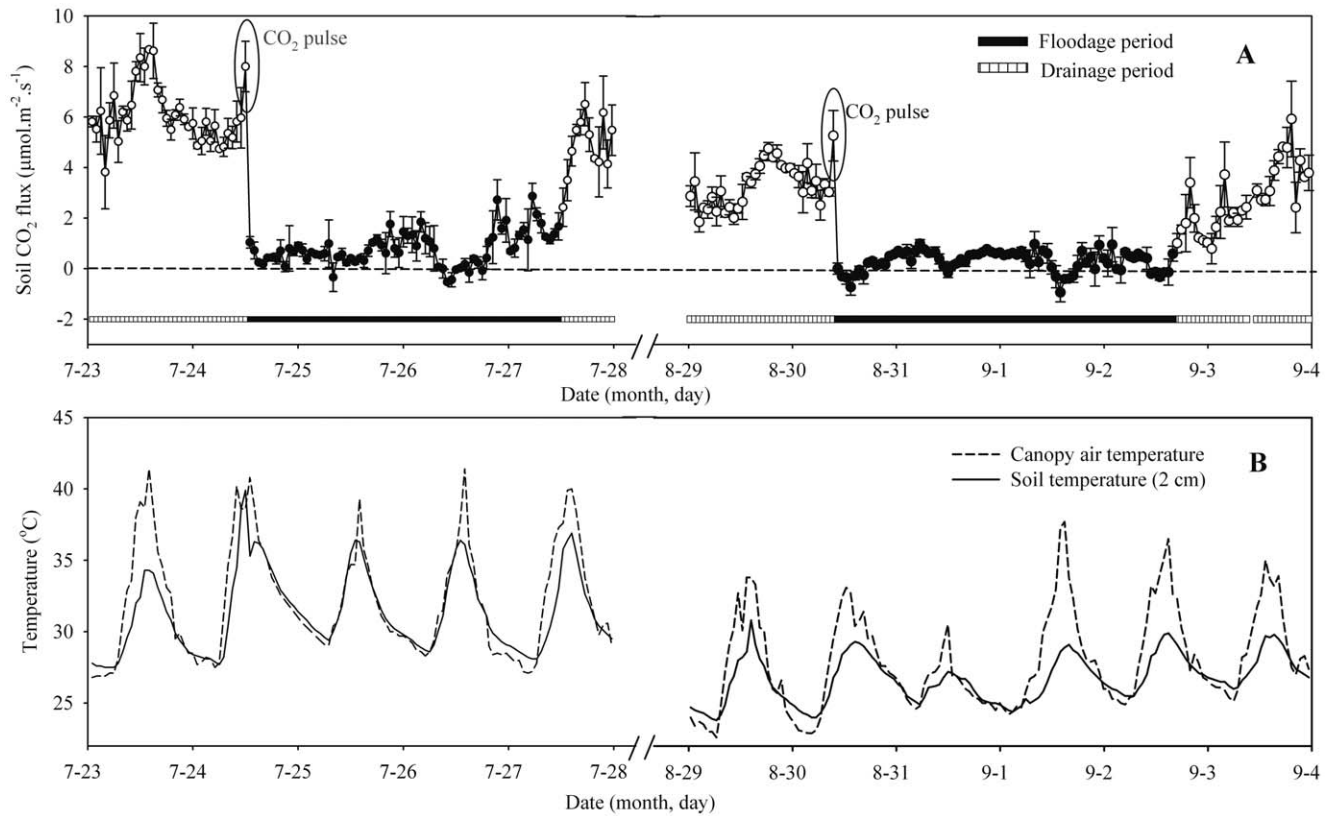

**Figure 4. Soil CO<sub>2</sub> fluxes, soil temperature (2 cm) and canopy temperature before, during, and after the flooding and draining cycle in a rice paddy field.**

doi:10.1371/journal.pone.0056562.g004

We examined possible seasonal effects of temperature on soil CO<sub>2</sub> flux and found significant relation between the two under both flooded and drained conditions, but with widely differing mechanisms. In the present study, we found a negative relation

between temperature and soil CO<sub>2</sub> flux, as long as soil CO<sub>2</sub> diffusivity is limiting as is the case during flooding period. An alternative explanation is based on the photosynthetic activity of the aquatic botany. The periods with the high photosynthetic

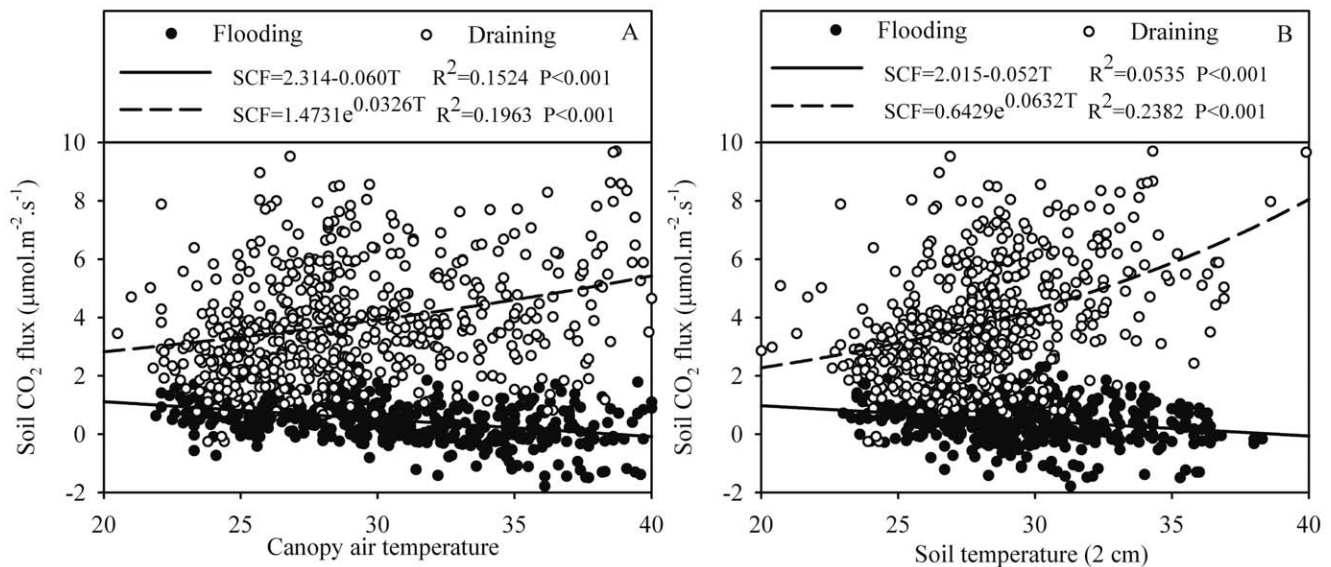

**Figure 5. Relationship between soil CO<sub>2</sub> fluxes and temperature under both flooded and drained conditions.** The solid lines represent the regression functions under flooded conditions, and the dashed lines represent the regression functions under drained conditions. (SCF: soil CO<sub>2</sub> fluxes; T: temperature).

doi:10.1371/journal.pone.0056562.g005

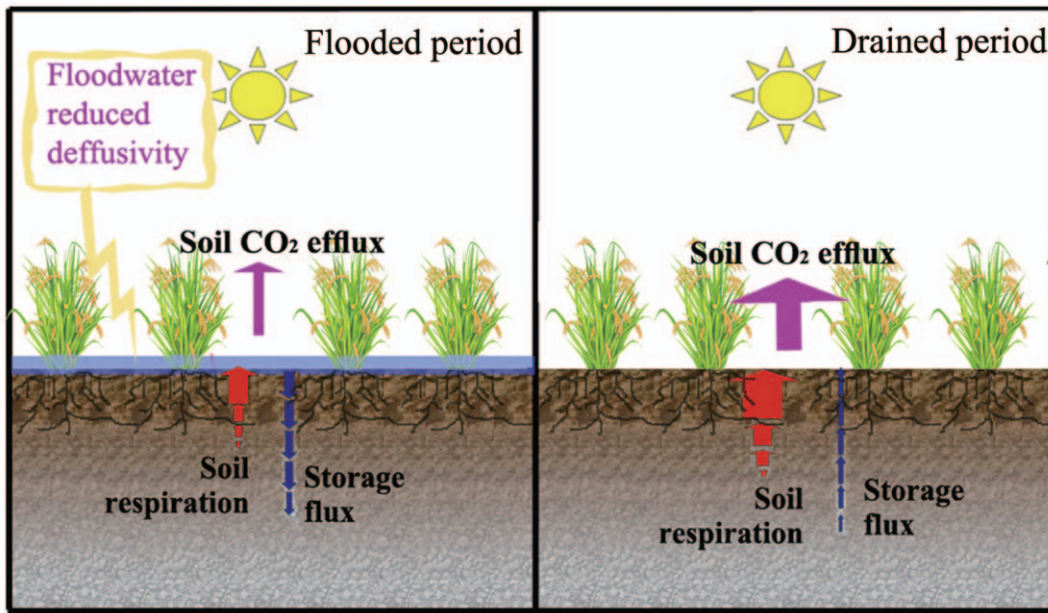

**Figure 6. Schematic comparison of soil CO<sub>2</sub> flux processes under the flooded and the drained conditions in rice paddies.**  
doi:10.1371/journal.pone.0056562.g006

active radiation are associated with conditions of high temperature in daytime (Fig. 3). Under drainage conditions, when soil aeration is assumed to be almost constant, soil temperature is considered to be a major control of soil CO<sub>2</sub> flux. Also the positive exponential relationship between soil CO<sub>2</sub> flux and temperature were observed during drainage period (Fig. 3). The results under drained conditions are similar to those of previous studies of CO<sub>2</sub> flux. For example, Chang et al. [38] found strong relationships between CO<sub>2</sub> flux and soil temperature and indicated that the rates of CO<sub>2</sub> emission increased exponentially with increases in soil temperature. Liu et al. [7], on the other hand, reported a significantly ( $P < 0.01$ ) linear relationship between soil CO<sub>2</sub> flux and soil temperature at a depth of 5 cm.

## Conclusions

From the comparison of soil CO<sub>2</sub> fluxes under draining and flooding conditions we conclude that: (1) the net effluxes of CO<sub>2</sub> from the paddy soil were lower when the paddy was flooding than

when it was draining, (2) the enhanced fluxes of CO<sub>2</sub> from the draining soil were due to removal of the barrier to gas transport from the soil surface to the air caused by the floodwater, and (3) there was a negative relation between soil CO<sub>2</sub> flux and temperature under flooding condition, whereas a positive relation under draining condition. The present study also showed how flooding and draining cycles affect the exchanges of CO<sub>2</sub> during the rice cultivation period. We need more measurements for multiple years to assess the long-term effect of an intermittent flooding and draining practice on the exchanges of CO<sub>2</sub> in rice paddy fields.

## Author Contributions

Conceived and designed the experiments: FC YL. Performed the experiments: KYW YT SLL. Analyzed the data: ZGL. Contributed reagents/materials/analysis tools: GSZ. Wrote the paper: YL.

## References

- Robertson GP, Paul EA, Harwood RR (2000) Greenhouse gases in intensive agriculture: Contributions of individual gases to the radiative forcing of the atmosphere. *Science* 289: 1922–1925.
- Li CF, Zhou DN, Kou ZK, Zhang ZS, Wang JP, et al. (2012) Effects of Tillage and Nitrogen Fertilizers on CH<sub>4</sub> and CO<sub>2</sub> Emissions and Soil Organic Carbon in Paddy Fields of Central China. *Plos One* 7: e34642.
- Guo JP, Zhou CD (2007) Greenhouse gas emissions and mitigation measures in Chinese agroecosystems. *Agricultural and Forest Meteorology* 142: 270–277.
- Rodhe H (1990) A Comparison of the Contribution of Various Gases to the Greenhouse-Effect. *Science* 248: 1217–1219.
- Xu M, Qj Y (2001) Soil-surface CO<sub>2</sub> efflux and its spatial and temporal variations in a young ponderosa pine plantation in northern California. *Global Change Biology* 7: 667–677.
- Saito M, Miyata A, Nagai H, Yamada T (2005) Seasonal variation of carbon dioxide exchange in rice paddy field in Japan. *Agricultural and Forest Meteorology* 135: 93–109.
- Liu Y, Li SQ, Yang SJ, Hu W, Chen XP (2010) Diurnal and seasonal soil CO<sub>2</sub> flux patterns in spring maize fields on the Loess Plateau, China. *Acta Agriculturae Scandinavica Section B-Soil and Plant Science* 60: 245–255.
- Maier M, Schack-Kirchner H, Hildebrand EE, Schindler D (2011) Soil CO<sub>2</sub> efflux vs. soil respiration: Implications for flux models. *Agricultural and Forest Meteorology* 151: 1723–1730.
- Yu XX, Zha TS, Pang Z, Wu B, Wang XP, et al. (2011) Response of Soil Respiration to Soil Temperature and Moisture in a 50-Year-Old Oriental Arborvitae Plantation in China. *Plos One* 6: e28397.
- Li CF, Kou ZK, Yang JH, Cai ML, Wang JP, et al. (2010) Soil CO<sub>2</sub> fluxes from direct seeding rice fields under two tillage practices in central China. *Atmospheric Environment* 44: 2696–2704.
- FAO (2010) FAOSTATS. Food and Agriculture Organization, Rome, Italy. <http://faostat.fao.org/default.aspx> (Accessed July, 2010).
- Solomon S, Qin D, Manning M, Chen Z, Marquis M, et al. (eds.) (2007) Contribution of Working Group I to the Fourth Assessment Report of the Intergovernmental Panel on Climate Change. Cambridge, UK: Cambridge University Press.
- Lee CH, Do Park K, Jung KY, Ali MA, Lee D, et al. (2010) Effect of Chinese milk vetch (*Astragalus sinicus* L.) as a green manure on rice productivity and methane emission in paddy soil. *Agriculture Ecosystems & Environment* 138: 343–347.
- Ruddiman WF, Thomson JS (2001) The case for human causes of increased atmospheric CH<sub>4</sub>. *Quaternary Science Reviews* 20: 1769–1777.
- Fuller DQ, van Etten J, Manning K, Castillo C, Kingwell-Banham E, et al. (2011) The contribution of rice agriculture and livestock pastoralism to prehistoric methane levels: An archaeological assessment. *Holocene* 21: 743–759.

16. Miyata A, Leuning R, Denmead OT, Kim J, Harazono Y (2000) Carbon dioxide and methane fluxes from an intermittently flooded paddy field. *Agricultural and Forest Meteorology* 102: 287–303.
17. Iqbal J, Hu RG, Lin S, Hatano R, Feng ML, et al. (2009) CO<sub>2</sub> emission in a subtropical red paddy soil (Ultisol) as affected by straw and N-fertilizer applications: A case study in Southern China. *Agriculture Ecosystems & Environment* 131: 292–302.
18. Wassmann R, Papen H, Rennenberg H (1993) Methane Emission from Rice Paddies and Possible Mitigation Strategies. *Chemosphere* 26: 201–217.
19. Tyagi L, Kumari B, Singh SN (2010) Water management - A tool for methane mitigation from irrigated paddy fields. *Science of the Total Environment* 408: 1085–1090.
20. Li CL, Zhang JD, Hou ZQ (eds.) (1993) Techniques for high yield cultivations of several main crops. China Scientific and Technological Publishing House Beijing. (In Chinese).
21. Cheng YQ, Yang LZ, Cao ZH, Ci E, Yin SX (2009) Chronosequential changes of selected pedogenic properties in paddy soils as compared with non-paddy soils. *Geoderma* 151: 31–41.
22. Kogel-Knabner I, Amelung W, Cao ZH, Fiedler S, Frenzel P, et al. (2010) Biogeochemistry of paddy soils. *Geoderma* 157: 1–14.
23. Campbell CS, Heilman JL, McInnes KJ, Wilson LT, Medley JC, et al. (2001) Diel and seasonal variation in CO<sub>2</sub> flux of irrigated rice. *Agricultural and Forest Meteorology* 108: 15–27.
24. Maier M, Schack-Kirchner H, Hildebrand EE, Holst J (2010) Pore-space CO<sub>2</sub> dynamics in a deep, well-aerated soil. *European Journal of Soil Science* 61: 877–887.
25. Itoh M, Sudo S, Mori S, Saito H, Yoshida T, et al. (2011) Mitigation of methane emissions from paddy fields by prolonging midseason drainage. *Agriculture Ecosystems & Environment* 141: 359–372.
26. Cai ZC, Tsuruta H, Rong XM, Xu H, Yuan ZP (2001) CH<sub>4</sub> emissions from rice paddies managed according to farmer's practice in Hunan, China. *Biogeochemistry* 56: 75–91.
27. Minamikawa K, Sakai N (2006) The practical use of water management based on soil redox potential for decreasing methane emission from a paddy field in Japan. *Agriculture Ecosystems & Environment* 116: 181–188.
28. Bronson KF, Neue HU, Singh U, Abao EB (1997) Automated chamber measurements of methane and nitrous oxide flux in a flooded rice soil. I. Residue, nitrogen, and water management. *Soil Science Society of America Journal* 61: 981–987.
29. Cai ZC, Tsuruta H, Gao M, Xu H, Wei CF (2003) Options for mitigating methane emission from a permanently flooded rice field. *Global Change Biology* 9: 37–45.
30. Cao GM, Tang YH, Mo WH, Wang YA, Li YN, et al. (2004) Grazing intensity alters soil respiration in an alpine meadow on the Tibetan plateau. *Soil Biology & Biochemistry* 36: 237–243.
31. Han GX, Zhou GS, Xu ZZ, Yang Y, Liu JL, et al. (2007) Biotic and abiotic factors controlling the spatial and temporal variation of soil respiration in an agricultural ecosystem. *Soil Biology & Biochemistry* 39: 418–425.
32. Lee X, Wu HJ, Sigler J, Oishi C, Siccama T (2004) Rapid and transient response of soil respiration to rain. *Global Change Biology* 10: 1017–1026.
33. Chen D, Molina JAE, Clapp CE, Venterea RT, Palazzo AJ (2005) Corn root influence on automated measurement of soil carbon dioxide concentrations. *Soil Science* 170: 779–787.
34. Birch HF (1964) Mineralisation of plant nitrogen following alternate wet and dry conditions. *Plant Soil* 20: 43–49.
35. Unger S, Maguas C, Pereira JS, David TS, Werner C (2010) The influence of precipitation pulses on soil respiration - Assessing the “Birch effect” by stable carbon isotopes. *Soil Biology & Biochemistry* 42: 1800–1810.
36. Inghima I, Alberti G, Bertolini T, Vaccari FP, Gioli B, et al. (2009) Precipitation pulses enhance respiration of Mediterranean ecosystems: the balance between organic and inorganic components of increased soil CO<sub>2</sub> efflux. *Global Change Biology* 15: 1289–1301.
37. Deneff K, Six J, Bossuyt H, Frey SD, Elliott ET, et al. (2001) Influence of dry-wet cycles on the interrelationship between aggregate, particulate organic matter, and microbial community dynamics. *Soil Biology & Biochemistry* 33: 1599–1611.
38. Chang SC, Tseng KH, Hsia YJ, Wang CP, Wu JT (2008) Soil respiration in a subtropical montane cloud forest in Taiwan. *Agricultural and Forest Meteorology* 148: 788–798.
